# Supplementary material for: Role of Viral Molecular Panels in Diagnosing the Etiology of Fever in Infants Younger Than 3 Months
Source: Clin Pediatr (Phila). 2019 Nov 9;59(1):45–52. doi: 10.1177/0009922819884582 (PMC7206330; doi:10.1177/0009922819884582)
Supplement: 20130121VR3M_resultats_Viro-CDM_MH_GV_final_CE – Supplemental material for Role of Viral Molecular Panels in Diagnosing the Etiology of Fever in Infants Younger Than 3 Months [file 20130121VR3M_resultats_Viro-CDM_MH_GV_final_CE.xls]

## Sheet: VR3M résultats viro
n°	Nr. patient	échantillon Nr. Protocol	ANP PCR Home Made	InflA	H1N1	InflB	RSVA	RSVB	PIV1	PIV2	PIV3	PIV4	Rhino	Adéno	Entéro	Boca	Corona 229E	Corona NL63	Corona OC43	hMPV	ANP PCR Micro Array	InflA	H1N1	H3N2	InflB	InflC	RSVA	RSVB	PIV1	PIV2	PIV3	PIV4	Rhino	Adéno	Entéro	Boca	Corona 229E	hMPVA	hMPVB		Ag ANP	InflA	InflB	RSV	hMPV	PIV	CMV	HSV	VZV
1	101025398	10394073										1																				1									1
2	101013709	10394260																																	1						1
5	101023355	10394647					1											1									1																	1
3	101013305	10394787					1																				1																	1
10	101026320	10395003						1																				1																1
9	101026326	10395007	inhib2x																																						1
4	101026156	10395008					1																				1																	1
6	101026249	10395164						1																				1																1
7	101010801	10395324																															1								1
11	101016671	10395433													1																				1						1
8	101015693	10395774					1							1													1						1											1
20	101014992	10396041	1																														1								1
12	101027249	10396211					1																				1																	1
13	101027687	10396605					1																				1																	1
14	101015661	10397042					1																				1						1											1
16	101024124	10397113					1																				1						1											1
15	101019421	10397118					1																																					1
17	101028185	10397250					1												1								1														1
18	101014683	10397252	1																														1								1
19	101022818	10397697					1																				1																	1
44	101019344	10397702					1																				1						1								1
21	101028753	10397870	1																																						1
22	101029104	10398313	1																														1								1
23	101029407	10398694					1																				1																	1
24	101019218	10398696					1																				1						1								1
26	101023027	10399014					1																				1																	1
30	101029378	10399017	1																														1								1
46	101017383	10399086					1																				1														1
45	101029398	10399103					1																				1														N
29	101029567	10399335	1																									1																1
31	101030461	10399841	1																		1																				1
33	101028740	10400245					1																				1									1					1
32	101014314	10400373	1																														1								1
35	101025322	10401448											1		1						1																				1
37	101019393	10401582	1																														1								1
36	101032054	10401590																	1														1								1
42	101019393	10401582	1																														1								1
39	101029784	10401898	1																														1								1
38	101028047	10401900	1																		1																				1
40	101028373	10402019	1																		1																				1
47	101018930	10402332	1																		1																				1
43	101022766	10402524																	1														1								1
34	101020357	10402921	1																		1																				1
41	101029854	10403933					1											1									1														1
49	101024807	10403935	1																									1																1
50	101028982	10404171	1																														1								1
51	101016840	10404332	1																		1																				1
48	101034705	10404589	1																		1																				N
52	101034898	10404705	1																														1								1
53	101030091	10405320	1																		1																				1
54	101024874	10406576	1																		1																				1
59	101032218	10406995				1																			1																		1
56	101032491	10407245							1																				1												1
55	101026673	10407254	1																						1																1
58	101024296	10407493	1																		1																				1
57	101030431	10407500																	1								1														1
61	101037365	10407711	1																		1																				1
60	101028047	10407752																	1		1																				1
62	101030091	10407967	1																		1																				1
64	101037987	10408567	1																		1																				1
63	101022024	10408814	1																								1														1
65	101026016	10408944																	1		1																				1
66	101039089	10409862	1																		1																				1
68	101024957	10410487																		1																		1			1
69	101033486	10410662											1																				1					1			1
70	101022738	10410723	1																		1																				1
71	101024415	10410910											1								N																				1
73	101029577	10411103											1								1																				1
72	101040201	10411233		1	1																	1	1																		1
74	101032899	10411852	1																		N																				1
75	101031010	10412007	1																														1								1
76	101033460	10412156	1																														1								1
77	101028090	10412403																	1	1																		1			1
88	101042181	10413598																1															1								1
80	101032504	10414172																		1							1											1			1
90	101023330	10414357	1																		1																				1
91	101043013	10414370	1																						1								1								1
92	101033888	10414519																		1																		1							1
81	101044090	10415668	1																														1								1
84	101030091	10415669												1																				1							1
83	101044320	10415911	1																														1								1
85	101027731	10416053											1																				1								1
99	101044726	10416409	1																														1								1
86	101044036	10416471	1																												1										1
101	101039806	10416530	1																		1																				1
100	101038536	10416576	1																		N																				1
87	101031979	10416603	1																		1																				1
102	101045366	10417333		1	1																	1	1																		1
103	101038864	10417334																	1		1																				1
105	101045702	10417808	1																		1																				1
104	101045269	10417875	1																		1																				N
106	101031313	10418464				1	1																		1		1														1
93	101046992	10419022					1						1												1		1						1								1
94	101046952	10419024	1																		1																				1
96	101034355	10419231	1																		1																				1
95	101047170	10419301											1								1																				1
98	101047822	10420116					1			1																				1							1				1
97	101042938	10420117											1																				1								1
107	101047999	10420349											1																					1							1
116	101040467	10420530																	1		1																				1
112	101048468	10420810				1																			1																1
109	101043428	10420814	1																																1						1
110	101031204	10420854																		1																		1			1
111	101039865	10420855											1																				1								1
113	101043013	10421883													1	1											1								1	1					1
114	101045028	10421884																		1																		1			1
115	101037136	10421885	1																															1				1			1
117	101037485	10421907											1																				1								1
118	101042123	10422216											1																				1			1					1
119	101044085	10423121											1																				1								1
121	101049520	10423716											1								inhibé																				1
120	101046944	10423741	1																																			1							1
122	101051094	10424160																1		1																		1							1
123	101034706	10424290	1																		1																									1
134	101048799	10424291	1																														1								1
135	101045496	10425093	1																														1								1
136	101035319	10425265											1																				1								1
137	101052115	10425406	1																		1																				1
138	101045475	10425782	1																		1																				1
139	101052705	10425946											1								1																				1
144	101052767	10425994	1																														1								1
140	101042789	10426099											1														1						1								1
141	101038864	10426498	1																		1																				1
142	101047959	10426523	1																														1								1
143	101053220	10426602	1																														1								1
157	101044845	10427434																		1																			1		1
159	101045475	10427608	1																		1																				1
158	101054172	10427609											1																				1								1
160	101046845	10428184											1								1																				1
146	101043573	10428909															1																				1				1
145	101054124	10428911									1			1																	1										1
147	101054054	10429399	1																														1								1
148	101055814	10429742	1																														1								1
151	101051210	10429867																		1													1						1						1
149	101039262	10429868																		1																			1						1
150	101055451	10429869																	1														1								1
124	101042124	10430960							1				1																				1								1
125	101050400	10431299	1																		1																				1
127	101057043	10431441											1							1													1						1		1
128	101052514	10431621																		1																			1						1
129	101056340	10431623	1																																			1			1
130	101049561	10431624	1																														1								1
131	101052513	10431626	1																												1		1								1
132	101056554	10431628							1																				1																	1
126	101043654	10431629											1								1																				1
133	101057404	10431792	1																									1													1
162	101045257	10432217	1																														1								1
161	101057541	10432301	1																														1								1
163	101042333	10433098									1																				1															1
165	101049893	10433473											1																				1								1
164	101053574	10433474											1																		1		1								1
168	101058752	10433475	1																														1								1
169	101042413	10433797											1																				1					1			1
152	101057636	10434293	N																		1																				1
153	101052432	10434571	N																		1																				1
155	101042630	10435006	N																							1															1
154	101051647	10435007	N																		1																				1
156	101059483	10435008	N																														1								1
166	101043568	10436810	N																														1								1
167	101053200	10436814	N																												1		1								1
173	101057887	10438499	N																		1																				1
172	101062720	10438510	N																														1								1
171	101056324	10438511	N																		1																				1
170	101050969	10438512	N																														1								1
174	101053572	10438601	N																		1																				1
178	101059206	10440010	N																												1		1								1
177	101062022	10440046	N																														1								1
175	101049171	10440140	N																												1		1								1
176	101059393	10440189	N																		1																				1
181	101065081	10441252	N																												1															1
180	101056095	10441254	N																												1		1													1
179	101049973	10441255	N																														1								1
182	101065832	10442068	N																														1								1
184	101048554	10443513	N																															1
183	101054268	10443515	N																															1
189	101063875	10444487	N																																1						1
188	101056095	10444489	N																														1								1
190	101068084	10444634	N																												1		1													1
197	101068603	10446178	N																														1		1						1
196	101068227	10446179	N																																1						1
200	101071099	10447777	N																								1				1										1
203	101055544	10447780	N																															1	1						1
202	101067857	10447783	N																														1								1
201	101053843	10447785	N																		1																				1
208	101071743	10450936	N																		1																				1
210	101072135	10452317	N																		1																				1
82	101029434	18465360																	1														1								1
67	101035219	18543352																1															1								1
78	101041054	18545404																1			1																				N
79	101039825	18551799	1																		1																				1
191	101068295	18669648	N																																1						1
187	101062022	18669649	N																														1		1						1
192	101063110	18669651	N																		1																				1
193	101057399	18669652	N																														1								1
199	101071850	18669653	N																																1						1
205	101072829	18669654	N																												1															1
206	101072829	18669655	N																												1															1
207	101073230	18669656	N																														1								1
209	101063340	18669657	N																														1		1						1
185	101054473	18669658	N																		1																				1
211	101068277	18669660	N																												1				1						1
186	101067442	18669661	N																																1						1
195	101056383	18669662	N																												1															1
204	101072135	18669692	N																		1																				1
194	101059946	18669695	N																												1															1
198	101060323	18669696	N																														1								1
[truncated: 21 more columns]

## Sheet: Feuil3 (2)
extractie: Qiasymphony Complex800_V3		nbre						home	micro	pcr	ag	cult
		27						25.9259	11.1111	7.40741	44.4444	33.3333
	Nr. patient	échantillon Nr. Protocol						20	24	25	15	18
			IN HOUSE PCR	Micro array 'PneumoVir'	PcR COR NL63/OC43	AG RSV Ag Adeno	Cult Viro
1	101025398	10394073	PIV 4	PIV 4		nég	nég	1	1	1	0	0
2	101013709	10394260	nég	EoV b		nég	nég	0	1	1	0	0
3	101013305	10394787	RSVA	RSVA		pos	pos	1	1	1	1	1
4	101026156	10395008	RSVA	RSVA		pos	pos	1	1	1	1	1
5	101026249	10395164	RSVB	RSVB		pos	pos	1	1	1	1	1
6	101010801	10395324	nég	Rhino		nég	Rhino	0	1	1	0	1
7	101015693	10395774	RSVA	RSVA		RSV (neg Adéno)	RSV	1	1	1	1	1	ct 25,42
	101015693		Adeno	nég									ct 38,26
	101015693		nég	Rhino
8	101023355	10394647	RSVA	RSVA		pos	RSV	1	1	1	1	0
	101023355		NL63	nég
9	101026326	10395007	nég	nég		nég	nég	0	0	0	0	0
10	101026320	10395003	RSVB	RSVB		pos	RSV	1	1	1	1	1
11	101016671	10395433(verd)	EoV	EoV		nég	EoV	1	1	1	0	1
12	101027249	10396211	RSVA	RSVA		pos	pos	1	1	1	1	1
13	101027687	10396605	RSVA	RSVA		pos	pos	1	1	1	1	1
14	101015661	10397042	RSVA	RSVA		pos	pos	1	1	1	1	1
			nég	Rhino
15	101019421	10397118	RSVA	nég		pos	pos	1	0	1	1	1
16	101024124	10397113	RSVA	RSVA		pos	pos	1	1	1	1	1
			nég	Rhino
17	1010298185	10397250	RSVA	RSVA		nég	pos	1	1	1	0	1
			OC43
18	101014683	10397252	nég	Rhino		nég	nég	0	1	1	0	0
19	101022818	10397697	RSVA	RSVA		pos	pos	1	1	1	1	1
20	101014992	10396041(verd)	nég	Rhino		nég	nég	0	1	1	0	0
21	101028753	10397870	nég	nég		nég	CMV
22	101029104	10398313	nég	Rhino		nég	nég	0	1	1	0	0
23	101029407	10398694	RSVA	RSVA		pos	RSV	1	1	1	1	1
24	101019218	10398696	RSVA	RSVA		nég	Rhino	1	1	1	0	1
			nég	Rhino
25	101029378	10399017	inhib	Rhino		nég	Rhino
26	101023027	10399014	RSVA	RSVA		pos	pos	1	1	1	1	1
27	101029398	10399103	RSVA	RSVA				1	1	1	1	0
28	101017383	10399086	RSVA	RSVA		nég	pos	1	1	1	0	1
29	101029567	10399335	inhib	RSVB		pos	pos
30 dubbel	101029378	10399017	nég	Rhino		nég	Rhino
31 dubbel	101029567	10399335	nég	RSVB		pos	pos
32	101030461	10399841	nég	nég		nég	nég
33	101014314	10400373	nég	Rhino		nég	Rhino
34	101028740	10400245	RSVA	RSVA		nég	RSVA
			nég	Boca			nég
35	101020357	10402921	nég	nég		nég	nég
36	101025322	10401448	Rhino	nég		nég	nég						ct 35,10
			EoV										ct 25,7
37	101032054	10401590	OC43	Rhino		nég	nég
38	101019393	10401582	nég	Rhino		nég	Rhino
39	101028047	10401900	nég	nég		nég	nég
40	101029784	10401898	nég	Rhino		nég	nég
41	101028373	10402019	nég	nég		nég	nég
42	101029854	10403933	NL63(+inhib)	RSVA		nég	nég
43	101019393	10401590	OC43	nég		nég	nég
44	101022766	10402524	OC43	Rhino		nég	nég
45	101019344	10397702	RSVA	RSVA,		nég	nég
			nég	Rhino
46 dubbel	101029398	10399103	RSVA	RSVA
47 dubbel	101017383	10399086	RSVA	RSVA		nég	RSVA
48	101018930	10402332	nég	nég		nég	nég
49	101034705	10404589	nég	nég		nég	nég
50	101024807	10403935	nég	RSVB		RSV	RSV
51	101028982	10404171	nég	Rhino		nég	Rhino
52	101016840	10404332	nég	nég		nég	nég
53	101034898	10404705	nég	Rhino		nég	nég
54	101030091	10405320	nég	nég		nég	nég
55	101024874	10406576	nég	nég		nég	neg
56	101026673	10407254	nég	Influ B		nég	Influ B
57	101032491	10407245	PIV1	PIV1		nég	PIV						RSV
58	101030431	10407500	Cor OC43	RSVA		nég	nég							In House	MA	cult
59	101024296	10407493	nég	nég		nég	nég							1	0	+
60	101032218	10406995	Influ B	Influ B		Influ B	Influ B							0	1	+
61	101028047	10407752	Cor OC43	nég		nég	nég							0	1	-
62	101037365	10407711	nég	nég		nég	nég							0	1	-
63	101030091	10407967	nég	nég		nég	nég							0	1	+
64	101022024	10408814	nég	RSVA		nég	nég							0	1	?
65	101037987	10408567	nég	nég		nég	nég							0	1	?
66	101026016	10408944	OC43	(Boca) (PIV4)		nég	nég
67	101039089	10409862	nég	nég		nég	nég
68	101035219	18543352	NL63	Rhino		nég	CMV
69	101024957	10410487	hMPV	hMPV A		nég	hMPV
70	101033486	10410662	Rhino	hMPV A Rhino		nég	Rhino
71	101022738	10410723	nég	nég		nég	nég
72	101024415	10410910	Rhino	Accidenté		nég	nég
73	101040201	10411233	Influ AH1N1	INFLA H1N1		nég	Influ A
74	101029577	10411103	Rhino	nég		nég	nég
75	101032899	10411852	nég	Accidenté		nég	nég
76	101031010	10412007	nég 2X	Rhino		nég	nég
77	101033460	10412156	Nég	Rhino		nég	nég
78	101028090	10412403	hMPV	hMPV A		nég	nég
			Cor C43
79	101041054	18545404	Cor NL63	nég		nég	nég
80	101039825	18551799	nég	nég		nég	nég
81	101032504	10414172	hMPV	hMPV A		nég
				RSVA			nég	geen étude blad
82	101044090	10415668	nég	Rhino		nég	nég
83	101029434	18465360	Cor OC43	Rhino		nég	nég
84	101044320	10415911	nég	Rhino		nég	nég
85	101030091	10415669	Adeno	ADENO		nég	Adeno
86	101027731	10416053	Rhino	Rhino		nég	Rhino
87	101044036	10416471	nég	PIV3		nég	PIV
88	101031979	10416603	nég	nég		nég	nég
99	101042181	10413598	Cor NL63	Rhino		nég	nég		10413558
	101032504	10414172	hMPV	*		nég	nég	HM 1x inhibé	2ième extraction???
100	101023330	10414357	nég	neg		nég	nég
101	101043013	10414370	nég	InflB		nég	nég		18462994
				Rhino
102	101033888	10414519	hMPV	hMPV A		hMPV	nég
103	101046992	10419022	Rhino	Rhino		nég	nég
			RSVA	hRSV A
				Influ B
104	101046952	10419024	nég	nég		nég	nég
105	101047170	10419301	Rhino	nég		nég	nég
106	101034355	10419231	nég	nég		nég	nég
107	101042938	10420117	Rhino	Rhino		nég	Rhino
108	101047822	10420116	RSVA	Cor 229		nég
			PIV 2	PIV 2			PIV
109	101044726	10416409	nég	Rhino		nég	nég
110	101038536	10416576	nég			nég	nég	niet uitgevoerd M
111	101039806	10416530	nég	nég		nég	nég
112	101045366	10417333	Influ A H1N1	INFLA H1N1		nég	Influ A
113	101038864	10417334	Cor OC43	nég		nég	nég
114	101045269	10417875	nég	nég		pas réalisé	pas réalisé
115	101045702	10417808	nég	nég		nég	nég
116	101031313	10418464	Influ B	Influ B		nég	Influ B
			RSV A	RSV A			RSV
117	101047999	10420349	Rhino	Adeno		nég	nég
118	101040467	10420530	Cor OC43	nég		nég	nég
119	101043428	10420814	nég	EoV		nég	nég
120	101031204	10420854	hMPV	hMPV A		nég	nég
121	101039865	10420855	Rhino	Rhino		nég	Rhino
122	101048468	10420810	Influ B	Influ B		nég	Influ B
123	101043013	10421883	Boca	Boca		nég	nég
			EoV	EoV			EoV
				hRSV A			nég
124	101045028	10421884	hMPV	hMPV A		nég	nég
125	101037136	10421885	nég	hMPV Adeno		nég	Adeno
126 dubbel	101040467	10420530	Cor OC43	nég		nég	nég	geen étude blad
127	101037485	10421907	Rhino	Rhino		nég	nég
128	101042123	10422216	Rhino	Rhino		nég	Rhino	geen étude blad
				Boca
129	101044085	10423121	Rhino	Rhino		nég	Rhino
130	101046944	10423741	nég	hMPV A		hMPV	nég
131	101049520	10423716	Rhino	PCR inhibé		nég	nég	geen étude blad		à vérifier avec les images du CAR 2x
	101049520	10422216	Rhino			nég	Rhino		dubbel
	?	10423121	Rhino			nég	Rhino		dubbel
	101042123	10423716	Rhino			nég	??		dubbel
132	101051094	10424160	hMPV	hMPV A		nég	hMPV
			Cor NL63
133	101034706	10424290	nég	nég		PIV	nég
134	101042124	10430960	Rhino	Rhino		nég	nég		sessie 77
			PIV1
135	101050400	10431299	nég	nég		nég	CMV
136		10431629	rhino	nég		nég	neg
137	10157043	10431441	hMPV	hMPV B		nég	Rhino
			Rhino	Rhino
138	101052514	10431621	hMPV	hMPV B		hMPV	nég
	101056340	10431623	nég	hMPV A		nég	nég
139	101049561	10431624	nég	Rhino		nég	nég
140	101052513	10431626	nég	PIV3		nég	nég
				Rhino		PIV	PIV
141	101056554	10431628	PIV1	PIV1
142	101057404	10431792	nég	RSVB		nég	nég
143	101048799	10424291	nég	Rhino		non réalisé	non réalisé		sessie 85
144	101045496	10425093	nég	Rhino		nég	Rhino
145	101035319	10425265	Rhino	Rhino		nég	nég
146	101052115	10425406	nég	nég		nég	nég
147	101045475	10425782	nég	nég		nég	nég
148	101052705	10425946	Rhino	nég		nég	nég
149	101042789	10426099	Rhino	Rhino,		nég	nég
				RSVA
150	101038864	10426498	nég	nég		nég	nég
151	101047959	10426523	nég	Rhino		nég	nég
152	101053220	10426602	nég	Rhino		nég	nég
153	101052767	10425994	nég	Rhino		nég	nég
154	101054124	10428911	PIV 3	PIV 3		nég	PIV		sessie79
			Adeno
155	101043573	10428909	Cor 229E	Cor 229E		nég	nég
156	101054054	10429399	nég	Rhino		nég	nég
157	101055814	10429742	nég	Rhino		nég	Rhino
158	101039262	10429868	hMPV B	hMPV B		hMPV	nég
159	101055451	10429869	Cor OC43	Rhino		nég	nég
160	101051210	10429867	hMPV B	hMPV B		hMPV	nég
				Rhino
161	101057636	10434293		nég	nég	nég	nég		sessie 77	* PCR HM niet meer systematisch uitgevoerd
162	101052432	10434571		nég	nég	nég	nég
163	101051647	10435007		nég	nég	nég	nég
164	101042630	10435006		INFL C	nég	nég	nég
165	101059483	10435008		Rhino	nég	nég	Rhino
166	101044845	10427434	hMPV	hMPV B		nég	nég		sessie 81
167	101054172	10427609	Rhino	Rhino		nég	Rhino
168	101045475	10427608	Nég	Nég		nég	nég
169	101046845	10428184	Rhino	Nég		nég	Rhino
170	101057541	10432301	nég	Rhino		nég	Rhino
171	101045257	10432217	Nég	Rhino		nég	Rhino
172	101042333	10433098	PIV3	PIV3		PIV	PIV
173	101053574	10433474	Rhino	PIV3		nég	nég
				Rhino
174	101049893	10433473	Rhino	Rhino		nég	nég
175	101043568	10436810		Rhino	nég	nég	nég
176	101053200	10436814		Rhino	nég	nég	nég
177				PIV3
178	101058752	10433475	nég	Rhino		nég	Rhino		sessie 85
179	101042413	10433797	Rhino	Rhino		nég	Rhino
				MPV A
180	101050969	10438512		Rhino	nég	nég	nég		sessie 87
181	101056324	10438511		nég	nég	nég	nég
182	101062720	10438510		Rhino	nég	nég	nég
183	101057887	10438499		neg	nég	nég	nég
184	101053572	10438601		nég	nég	nég	nég
185	101049171	10440140		PIV3	nég	nég	PIV		sessie 88
				Rhino
186	101059393	10440189		nég	nég	nég	nég
187	101062022	10440046		Rhino	nég	nég	Rhino
188	101059206	10440010		PIV3	nég	nég	nég
				Rhino
189	101049973	10441255		Rhino	nég	nég	Rhino
190	101056095	10441254		PIV3	nég	PIV	PIV
				Rhino
191	101065081	10441252		PIV3	nég	PIV	PIV
192	101065832	10442068		Rhino	nég	nég	nég		session 94
193	101054268	10443515		ADENO	nég	Adeno	Adeno
194	101048554	10443513		ADENO	nég	Adeno	Adeno
195	101054473	18669658		nég	nég	nég	nég
196	101067442	18669661		EoV	nég	nég	EoV		sessie 95
197	101062022	18669649		Rhino	nég	nég	Eov
				EoV
198	101056095	10444489		Rhino	nég	nég	nég
199	101063875	10444487		EoV	nég	nég	nég
200	101068084	10444634		PIV3	nég	PIV	PIV
				Rhino
201	101068295	18669648		EoV	nég	nég	EoV
202	101063110	18669651		nég	nég	nég	nég		sessie 99
203	101057399	18669652		Rhino	nég	nég	nég
204	101059946	18669695		PIV3	nég	PIV	PIV
205	101056383	18669662		PIV3	nég	PIV	PIV
206	101068227	10446179		EoV	nég	nég	EoV
207	101068603	10446178		EoV	nég	nég	EoV
				Rhino
208	101060323	18669696		Rhino	nég	nég	CMV		sessie 102
209	101071850	18669653		EoV	nég	nég	nég
210	101071099	10447777		PIV3	nég	nég	nég
				RSVA			?
211	101053843	10447785		nég	nég	nég	nég
212	101067857	10447783		Rhino	nég	nég	Rhino
213	101055544	10447780		EoV	nég	nég	EoV
				ADENO			?
214	101072135	18669692		nég	nég	nég	nég		sessie 103
215	101072829	18669654		PIV3	nég	PIV	PIV
216	101072829	18669655		PIV3	nég	PIV	PIV
217	101073230	18669656		Rhino	nég	nég	nég
218	101071743	10450936		nég	nég	nég	nég		sessie 108
219	101063340	18669657		EoV	nég	nég	nég
				Rhino			?
220	101072135	10452317		nég	nég	nég	nég
221	101068277	18669660		EoV	nég	nég	EoV
				PIV3
Calcul
PCR IN HOUSE + Micro Array = 160
	15 PCR:160*15=2400
	monoplex: 9*160=1140
	duplex: 3*160=480
Micro Array uniquement = 45
corona NL63 et OC43 = 45 (45*2=90)
Conclusion
Nombre d'échantillons en PCR INHOUSE: 160
Nombre d'échantillons en Microarray: 205
Nombre d'échantillons en PCR IN HOUSE: 160 et 45 pour CORNL63/OC43 soit 2400 + 90 = 2490 PCR

## Sheet: légende VR3M résultats
légende:
"1" dans la colonne générale: tests effectués (méthode)
"1" dans la colonne test: un résultat positif est obetenu
"N" : méthode non réalisée
* sur un autre prélèvement
